# Supplementary material for: Honeycomb, a New Food Resource with Health Care Functions: The Difference of Volatile Compounds found in Apis cerana and A. mellifera Honeycombs
Source: MDPI journal article supplement (doi:10.3390/foods11203204), 2022-10-14
Supplement: s1 [file s1]

**Honeycomb, a new food resource with health care function: the difference of volatile compounds between honeycombs from *Apis cerana* and *A. mellifera***

Xiali Guo 1, Yanlang Lian 1, Shengxiang Yi 1, Shengrong Qiu 1, Mingyan Liu 1, Fangjian Ning 2\*, Liping Luo 1,3\*

<sup>1</sup> School of Life Sciences, Nanchang University, Nanchang, 330031, China

<sup>2</sup> School of Food and Health, Beijing Technology and Business University, Beijing 100048, China

<sup>3</sup> State Key Laboratory of Food Science and Technology, Nanchang University, Nanchang, 330031, China

\* Corresponding author:

1-Liping Luo:

lluo2@126.com

Tel: +86-0791-83969519; Fax: +86-0791-83969519

2-Fangjian Ning

ningfj@btbu.edu.cn

Tel: +86-010-68984003; Fax: +86-010-68984003

**Supplementary Table S1.** Compounds in ACC and AMC detected by SPME-GC-MS (n = 3, the equivalent of 1-octanol).

| Code         | CAS No     | Compounds           | RT    | RI <sup>a</sup> | RI <sup>b</sup> | Content [μg/kg (range)]    |                          | <i>p</i> Value |
|--------------|------------|---------------------|-------|-----------------|-----------------|----------------------------|--------------------------|----------------|
|              |            |                     |       |                 |                 | AMC=5                      | ACC=5                    |                |
| Aldehydes    |            |                     |       |                 |                 |                            |                          |                |
| 1            | 498-60-2   | Furfural            | 2.12  | 815             | 832             | 1786.01 (37.19- 4675.71)   | nd                       | 0.011          |
| 2            | 111-71-7   | Heptanal            | 4.83  | 906             | 901             | nd                         | 80.23 (0- 146.44)        | 0.072          |
| 3            | 100-52-7   | Benzaldehyde        | 7.48  | 961             | 961             | 406.44 (39.75- 566.20)     | 82.68 (0- 256.28)        | 0.075          |
| 4            | 620-02-0   | 5-MethyIfurfural    | 7.83  | 969             | 966             | 117.68 (0- 269.67)         | nd                       | 0.066          |
| 5            | 124-13-0   | Octanal             | 9.61  | 1005            | 1001            | 2455.65 (1580.44- 3980.78) | 1137.23 (0- 5686.13)     | 0.043          |
| 6            | 122-78-1   | Benzeneacetaldehyde | 11.65 | 1046            | 1049            | 509.97 (107.77- 893.87)    | 783.86 (182.24- 1700.34) | 0.470          |
| 7            | 124-19-6   | Nonanal             | 14.71 | 1107            | 1102            | 824.11(469.89-1188.21)     | 2218.04 (884.86-4168.88) | 0.020          |
| 8            | 53447-46-4 | Lilac aldehyde A    | 16.95 | 1153            | 1154            | 131.74 (90.92-189.89)      | 25.49 (0-101.26)         | 0.006          |
| 9            | 112-31-2   | Decanal             | 19.59 | 1208            | 1195            | 820.38 (295.15-1528.94)    | 263.97 (53.08-363.35)    | 0.014          |
| 10           | 3913-81-3  | trans-2-Decenal     | 22.19 | 1264            | 1265            | nd                         | 37.16 (0-185.79)         | 0.374          |
| 11           | 112-44-7   | Undecanal           | 24.23 | 1309            | 1308            | 4.94 (0-24.71)             | 132.63(0-259.79)         | 0.082          |
| Hydrocarbons |            |                     |       |                 |                 |                            |                          |                |
| 1            | 100-42-5   | Styrene             | 4.22  | 880             | 890             | 274.22 (198.39-326.78)     | 560.05 (129.64-917.85)   | 0.233          |
| 2            | 124-18-5   | Decane              | 9.37  | 1001            | 1000            | nd                         | 50.62 (0-253.11)         | 0.374          |
| 3            | 1120-21-4  | Undecane            | 14.41 | 1101            | 1100            | 8.57 (0-42.83)             | 20.06 (0-100.31)         | 0.374          |
| 4            | 112-40-3   | Dodecane            | 19.25 | 1200            | 1200            | 99.06 (0-224.11)           | 126.56 (0-397.62)        | 0.618          |
| 5            | 13360-61-7 | 1-Pentadecene       | 31.44 | 1480            | 1489            | nd                         | 11.29 (0-56.46)          | 0.374          |
| 6            | 629-62-9   | Pentadecane         | 32.21 | 1499            | 1500            | 1135.15 (187.42-2395.90)   | 1334.49 (0-3282.68)      | 0.704          |

|         |            |                   |       |      |      |                         |                          |       |
|---------|------------|-------------------|-------|------|------|-------------------------|--------------------------|-------|
| 7       | 629-78-7   | Heptadecane       | 39.72 | 1698 | 1700 | 330.25 (94.3-622.81)    | 203.86 (49.75-376.72)    | 0.469 |
| 8       | 593-45-3   | Octadecane        | 43.19 | 1799 | 1800 | 110.07 (0-550.36)       | 141.35 (0-445.69)        | 0.703 |
| 9       | 638-36-8   | Phytan            | 43.50 | 1808 | 1809 | nd                      | 28.76 (0-143.78)         | 0.374 |
| 10      | 629-92-5   | Nonadecane        | 46.51 | 1900 | 1900 | 212.69 (47.5-472.63)    | 181.75 (47.38-342.78)    | 0.999 |
| 11      | 112-95-8   | Eicosane          | 49.10 | 2000 | 2000 | 45.17 (0-225.85)        | nd                       | 0.374 |
| 12      | 629-94-7   | Heneicosane       | 50.80 | 2100 | 2100 | 132.75 (32.82-306.27)   | 128.41 (0-320.84)        | 0.927 |
| 13      | 593-49-7   | Heptacosane       | 53.24 | 2700 | 2700 | 88.37 (35.24-166.95)    | 127.77 (45.76-236.34)    | 0.446 |
| Ketones |            |                   |       |      |      |                         |                          |       |
| 1       | 110-43-0   | 2-Heptanone       | 4.41  | 892  | 894  | nd                      | 136.25 (0-533.48)        | 0.195 |
| 2       | 110-93-0   | Sulcatone         | 9.01  | 993  | 987  | 99.29 (0-227.13)        | 35.03 (0-175.13)         | 0.228 |
| 3       | 98-86-2    | Acetophenone      | 12.83 | 1069 | 1065 | 48.21 (0-141.19)        | 8.81 (0-44.04)           | 0.220 |
| 4       | 821-55-6   | 2-Nonanone        | 14.15 | 1096 | 1090 | 396.88 (155.94-1046.83) | 1113.45 (630.42-2454.69) | 0.071 |
| 5       | 78-59-1    | Isophorone        | 15.39 | 1121 | 1118 | 31.28 (0-110.10)        | 847.59 (0-3093.12)       | 0.039 |
| 6       | 14309-57-0 | 3-Nonen-2-one     | 16.52 | 1144 | 1136 | nd                      | 50.08 (0-250.42)         | 0.374 |
| 7       | 1125-21-9  | 4-Oxoisophorone   | 16.57 | 1145 | 1142 | 271.59 (0-843.45)       | 1707.45 (90.16-2896.75)  | 0.047 |
| 8       | 20547-99-3 | Dihydrooxophorone | 17.75 | 1169 | 1170 | 48.03 (0-163.34)        | 276.68 (0-509.03)        | 0.047 |
| 9       | 112-12-9   | 2-Undecanone      | 23.67 | 1296 | 1294 | nd                      | 38.84 (0-165.77)         | 0.307 |
| 10      | 23726-93-4 | Damascenone       | 27.57 | 1386 | 1384 | nd                      | 320.20 (0-1447.59)       | 0.174 |
| 11      | 14901-07-6 | β-Ionone          | 31.68 | 1486 | 1488 | 36.33 (0-181.65)        | nd                       | 0.374 |
| Ester   |            |                   |       |      |      |                         |                          |       |
| 1       | 108-29-2   | 4-Pentanolide     | 7.20  | 956  | 950  | 6.14 (0-30.71)          | 16.28 (0-81.42)          | 0.545 |
| 2       | 123-66-0   | Ethyl caproate    | 9.60  | 1005 | 996  | nd                      | 556.20 (0-2568.52)       | 0.211 |
| 3       | 1073-11-6  | Lavender lactone  | 11.52 | 1043 | 1041 | 19.95 (0-99.76)         | nd                       | 0.374 |

|    |            |                            |       |      |      |                         |                          |       |
|----|------------|----------------------------|-------|------|------|-------------------------|--------------------------|-------|
| 4  | 93-58-3    | Methyl benzoate            | 14.27 | 1098 | 1091 | 49.58 (0-128.00)        | 26.31 (0-131.54)         | 0.403 |
| 5  | 106-30-9   | Ethyl enanthate            | 14.54 | 1104 | 1095 | nd                      | 264.45 (0-518.47)        | 0.027 |
| 6  | 111-11-5   | Methyl caprylate           | 15.81 | 1130 | 1126 | 21.38 (0-106.90)        | nd                       | 0.374 |
| 7  | 93-89-0    | Benzoic ether              | 17.97 | 1174 | 1170 | 153.38 (0-346.86)       | 446.42 (0-855.68)        | 0.037 |
| 8  | 101-41-7   | Methyl phenylacetate       | 18.43 | 1183 | 1179 | nd                      | 103.39 (0-413.54)        | 0.156 |
| 9  | 123-25-1   | Ethyl succinate            | 18.75 | 1190 | 1181 | 64.58 (0-322.90)        | 119.22 (0-265.70)        | 0.499 |
| 10 | 119-36-8   | Betula                     | 19.06 | 1196 | 1187 | 27.95 (0-79.15)         | 254.76 (0-583.99)        | 0.025 |
| 11 | 106-32-1   | Ethyl octoate              | 19.32 | 1202 | 1196 | 570.63 (107.67-1253.65) | 486.81 (120.5-823.36)    | 0.705 |
| 12 | 1731-84-6  | Methyl nonanoate           | 20.60 | 1230 | 1224 | 4.66 (0-23.3)           | 4.79 (0-23.94)           | 0.374 |
| 13 | 115-95-7   | Linalyl acetate            | 21.29 | 1245 | 1248 | nd                      | 139.63 (0-698.15)        | 0.374 |
| 14 | 101-97-3   | Ethyl phenacetate          | 21.55 | 1250 | 1244 | 44.41 (0-123.39)        | 1417.72 (92.14-3548.17)  | 0.003 |
| 15 | 103-45-7   | Benzylcarbiny<br>l acetate | 22.06 | 1261 | 1256 | nd                      | 356.74 (49.5-964.47)     | 0.009 |
| 16 | 123-29-5   | Ethyl nonanoate            | 23.84 | 1300 | 1294 | 376.77 (54.2-852.7)     | 1011.57 (99.49-1948.88)  | 0.008 |
| 17 | 110-42-9   | Methyl caprate             | 25.07 | 1328 | 1325 | 11.52 (0-57.62)         | nd                       | 0.374 |
| 18 | 110-38-3   | Ethyl caprate              | 28.13 | 1399 | 1397 | 415.50 (76.37-1146.75)  | 462.56 (164.36-756.92)   | 0.332 |
| 19 | 51154-96-2 | Massoilactone              | 31.46 | 1480 | 1483 | nd                      | 142.28 (0-711.41)        | 0.374 |
| 20 | 17092-92-1 | Ledene                     | 33.33 | 1528 | 1525 | 27.38 (0-97.5)          | nd                       | 0.225 |
| 21 | 124-06-1   | Ethyl myristate            | 43.13 | 1797 | 1793 | 24.18 (0-120.92)        | 197.86 (0-410.93)        | 0.242 |
| 22 | 84-69-5    | Diisobutyl phthalate       | 45.63 | 1873 | 1872 | 54.20 (0-223.92)        | 235.01 (0-960.05)        | 0.075 |
| 23 | 112-39-0   | Methyl palmitate           | 47.44 | 1936 | 1928 | 28.68 (0-98.20)         | 33.99 (0-131.25)         | 0.962 |
| 24 | 84-74-2    | Dibutyl phthalate          | 48.41 | 1973 | 1968 | 51.44 (0-225.12)        | 219.98 (0-814.72)        | 0.033 |
| 25 | 628-97-7   | Ethyl palmitate            | 49.06 | 1998 | 1996 | 147.22 (0-586.24)       | 1184.05 (254.52-2434.95) | 0.035 |

|          |            |                                    |       |      |                  |                          |                          |       |
|----------|------------|------------------------------------|-------|------|------------------|--------------------------|--------------------------|-------|
| 26       | 111-62-6   | Ethyl Oleate                       | 51.77 | 2179 | 55.39 (0-245.45) | 27.50 (0-137.49)         | 0.773                    |       |
| Terpenes |            |                                    |       |      |                  |                          |                          |       |
| 1        | 80-56-8    | 2-Pinene                           | 6.00  | 931  | 939              | nd                       | 12.42 (0-62.10)          | 0.374 |
| 2        | 3391-86-4  | Matsutake alcohol                  | 8.61  | 985  | 986              | nd                       | 35.49 (0-177.43)         | 0.374 |
| 3        | 123-35-3   | Myrcene                            | 9.04  | 994  | 992              | 17.55 (0-87.74)          | nd                       | 0.374 |
| 4        | 138-86-3   | Limonene                           | 10.73 | 1027 | 1030             | 163.72 (91.67-232.19)    | 23.62 (0-66.79)          | 0.009 |
| 5        | 13877-91-3 | Ocimene                            | 11.89 | 1051 | 1044             | 223.24 (77.01-339.63)    | 4.97 (0-24.83)           | 0.001 |
| 6        | 5989-33-3  | Linalool oxide                     | 13.03 | 1073 | 1065             | 2387.28 (0-10463.23)     | 3884.36 (79.88-3842.28)  | 0.361 |
| 7        | 34995-77-2 | trans-Linalol oxide                | 13.84 | 1089 | 1087             | 1049.32 (0-4471.13)      | 4134.56 (76.68-17541.38) | 0.374 |
| 8        | 78-70-6    | Linalool                           | 14.51 | 1103 | 1104             | 1044.88 (277.29-1987.13) | nd                       | 0.001 |
| 9        | 39028-58-5 | trans-linalool oxide<br>(pyranoid) | 18.15 | 1178 | 1183             | 129.64 (0-286.06)        | 457.45 (0-1185.90)       | 0.324 |
| 10       | 1197-01-9  | p-cymenol                          | 18.65 | 1188 | 1188             | 12.71(0-63.55)           | 67.57 (0-337.86)         | 0.631 |
| 11       | 10482-56-1 | Alpha terpineol                    | 18.80 | 1191 | 1187             | 665.98 (290.19-1156.36)  | 141.72 (0-708.61)        | 0.046 |
| 12       | 106-26-3   | cis-Citral                         | 21.32 | 1245 | 1242             | nd                       | 23.78 (0-118.89)         | 0.374 |
| 13       | 17699-14-8 | Cubebene                           | 25.93 | 1348 | 1349             | 9.27 (0-46.36)           | nd                       | 0.374 |
| 14       | 3856-25-5  | Copaene                            | 27.02 | 1373 | 1376             | 53.39 (0-173.20)         | 456.79 (0-1014.44)       | 0.119 |
| 15       | 94482-89-0 | Isoitalicene                       | 27.34 | 1381 | 1385             | 20.30 (0-101.48)         | 67.59 (0-308.71)         | 0.696 |
| 16       | 515-13-9   | beta elemene                       | 27.77 | 1390 | 1394             | 85.31 (0-284.24)         | 74.11 (0-267.10)         | 0.959 |
| 17       | 118-65-0   | Isocaryophyllene                   | 28.32 | 1404 | 1404             | nd                       | 9.32 (0-46.62)           | 0.374 |
| 18       | 469-61-4   | Cedr-8-ene                         | 28.49 | 1408 | 1408             | 1105.61 (521.65-2364.14) | 1010.68 (158.19-1904.82) | 0.745 |
| 19       | 546-28-1   | Cedr-8(15)-ene                     | 28.81 | 1415 | 1413             | 310.91 (0-1075.51)       | 491.51 (0-2226.64)       | 0.747 |
| 20       | 87-44-5    | Caryophyllene                      | 28.82 | 1416 | 1417             | 348.32 (0-1323.38)       | 1133.73 (0-2192.97)      | 0.236 |

[illegible]

|    |            |                        |       |      |      |                    |                   |       |
|----|------------|------------------------|-------|------|------|--------------------|-------------------|-------|
| 1  | 116-53-0   | Ethylmethylacetic acid | 3.37  | 824  | 832  | 22.91 (0-114.53)   | nd                | 0.374 |
| 2  | 1192-62-7  | Acetylfuran            | 5.30  | 916  | 915  | 339.38 (0-933.86)  | 19.62 (0-98.10)   | 0.038 |
| 3  | 3658-80-8  | Dimethyl trisulfide    | 7.72  | 966  | 972  | 364.32 (0-1077.54) | 230.91 (0-485.32) | 0.686 |
| 4  | 108-95-2   | Phenol                 | 9.08  | 994  | 994  | 64.44 (0-209.06)   | nd                | 0.185 |
| 5  | 541-73-1   | Metadichlorobenzene    | 9.86  | 1010 | 1007 | 176.70 (0-363.21)  | 308.63 (0-860.75) | 0.405 |
| 6  | 1072-83-9  | 2-Acetylpyrrole        | 12.92 | 1071 | 1065 | 452.19 (0-1504.82) | 306.28 (0-817.03) | 0.328 |
| 7  | 124-07-2   | Octanoic acid          | 18.91 | 1193 | 1180 | 54.54 (0-204.57)   | nd                | 0.206 |
| 8  | 5756-24-1  | Dimethyl tetrasulfide  | 19.80 | 1212 | 1206 | 233.19 (0-798.60)  | 53.71 (0-204.19)  | 0.359 |
| 9  | 2785-89-9  | p-Ethylguaiaicol       | 23.05 | 1283 | 1280 | nd                 | 12.71 (0-63.55)   | 0.374 |
| 10 | 112-05-0   | Nonanoic acid          | 23.06 | 1283 | 1280 | nd                 | 21.89 (0-109.45)  | 0.374 |
| 11 | 30364-38-6 | Dehydro-ar-ionene      | 26.04 | 1351 | 1349 | 111.47 (0-256.72)  | 36.90 (0-78.53)   | 0.174 |
| 12 | 334-48-5   | Capric acid            | 27.19 | 1377 | 1380 | 15.36 (0-76.80)    | nd                | 0.374 |

Notes: RT— Retention time (min); RI<sup>a</sup>—retention index calculated as determined on HP-5MS column using the homologous series of n-alkanes (C6–C40); RI<sup>b</sup>—retention index from the NIST network database; nd—not detected; *p* Value —two-sample t-test significant values at a level of 0.05.
